# Supplementary material for: Impact of HER2 Status on Pathological Response after Neoadjuvant Chemotherapy in Early Triple-Negative Breast Cancer
Source: MDPI journal article supplement (doi:10.3390/cancers14102509), 2022-05-19

## **SUPPLEMENTARY DATA**

**Supplementary Table S1.** Association between HER2-low (HER2 1+ versus HER2 1+) and pCR

**Supplementary Table S2.** Clinicopathological characteristics of the tumours after surgery

**Supplementary Table S3.** D-DFS according to HER2 status

**Supplementary Table S4.** Evolution of PLR and NLR at baseline and after treatment

**Supplementary Table S5.** Outcomes according to baseline PLR et HER2 status

**Supplementary Figure S1.** Outcomes according to baseline PLR. A) OS and B) I-DFS

**Supplementary Table S1. Association between HER2-low (HER2 1+ versus HER2 1+) and pCR.**

|            | HER2 1+<br>(N = 95) | HER 2+<br>(N = 31) | p-value      |
|------------|---------------------|--------------------|--------------|
| <b>pCR</b> |                     |                    | <i>0.673</i> |
| No         | 60 (63.2%)          | 21 (67.7%)         |              |
| Yes        | 35 (36.8%)          | 10 (32.3%)         |              |

**Supplementary Table S2. Clinicopathological characteristics after surgery.**

|                                  | HER2-0<br>(N = 323) | HER2-low<br>(N = 126) | Total<br>(N = 449) |
|----------------------------------|---------------------|-----------------------|--------------------|
| <b>mSBR grade</b>                |                     |                       |                    |
| Grade II                         | 5/38 (13.2%)        | 1/10 (10.0%)          | 6/48 (12.5%)       |
| Grade III                        | 33/38 (86.8%)       | 9/10 (90.0%)          | 42/48 (87.5%)      |
| <b>RE</b>                        |                     |                       |                    |
| 0                                | 91/97 (93.8%)       | 36/39 (92.3%)         | 127/136 (93.4%)    |
| 1-10%                            | 6/97 (6.2%)         | 3/39 (7.7%)           | 9/136 (6.6%)       |
| <b>IHC HER2</b>                  |                     |                       |                    |
| 0                                | 83/88 (94.3%)       | 18/38 (47.4%)         | 101/126 (80.2%)    |
| 1+                               | 4/88 (4.5%)         | 15/38 (39.5%)         | 19/126 (15.1%)     |
| 2+                               | 1/88 (1.1%)         | 5/38 (13.2%)          | 6/126 (4.8%)       |
| <b>Ki67 (%)</b>                  |                     |                       |                    |
| Median (Q1, Q3)                  | 31.0 (8.0, 50.0)    | 52.0 (30.0, 70.0)     | 34.0 (10.0, 60.0)  |
| <b>TILs</b>                      |                     |                       |                    |
| Yes                              | 103/315 (32.7%)     | 37/124 (29.8%)        | 140/439 (31.9%)    |
| <b>Interval response imaging</b> |                     |                       |                    |
| Stable disease                   | 87/213 (40.8%)      | 28/88 (31.8%)         | 115/301 (38.2%)    |
| Progress                         | 5/213 (2.3%)        | 3/88 (3.4%)           | 8/301 (2.7%)       |
| Partial or complete response     | 121/213 (56.8%)     | 57/88 (64.8%)         | 178/301 (59.1%)    |

**Supplementary Table S3.** D-DFS according to HER2 status.

|               | events/n | 5 years D-DFS rate<br>[95%CI] |
|---------------|----------|-------------------------------|
| <b>HER2</b>   |          |                               |
| HER2 0        | 97/316   | 68.5% [62.7;73.6]             |
| HER2 1+ ou 2+ | 49/121   | 63.1% [53.7;71.1]             |

**Supplementary Table S4.** Evolution of PLR at baseline and after treatment.

|                | Median difference<br>(after – before CT) | Ratio<br>(after/ before<br>CT) | Evolution rate<br>% | P value<br>(paired<br>test*) |
|----------------|------------------------------------------|--------------------------------|---------------------|------------------------------|
| <b>PLR</b>     |                                          |                                |                     |                              |
| Median (range) | 110.3 (-274.5; 1412.4)                   | 1.8 (0.3; 9.3)                 | 75.5 (-71.7, 826.4) | <b>&lt;0.001</b>             |
| Missing        | 51                                       | 51                             | 51                  |                              |

\*Wilcoxon signed Rank test; CT: chemotherapy

**Supplementary Table S5.** Outcomes according to baseline PLR and HER2 status.

| <b>OS</b>           |     |                  |       |                  |       |
|---------------------|-----|------------------|-------|------------------|-------|
|                     | n   | HR [CI 95%]      | p     | HR [CI 95%]      | p     |
| <b>Baseline PLR</b> |     |                  |       |                  |       |
| --- ≥ 190           |     |                  |       |                  |       |
| HER2-0              | 60  | 1.00 (ref)       |       | 2.28 [1.40;3.71] | 0.001 |
| HER2-low            | 37  | 0.54 [0.27;1.09] | 0.085 | 1.24 [0.66;2.33] | 0.508 |
| — < 190             |     |                  |       |                  |       |
| HER2-0              | 224 | 0.44 [0.27;0.71] | 0.001 | 1.00 (ref)       |       |
| HER2-low            | 76  | 0.73 [0.42;1.25] | 0.246 | 1.65 [1.05;2.62] | 0.031 |
| <b>i-DFS</b>        |     |                  |       |                  |       |
|                     | n   | HR [CI 95%]      | p     | HR [CI 95%]      | p     |
| <b>Baseline PLR</b> |     |                  |       |                  |       |
| --- ≥ 190           |     |                  |       |                  |       |
| HER2-0              | 60  | 1.00 (ref)       |       | 2.03 [1.31;3.16] | 0.002 |
| HER2-low            | 37  | 0.58 [0.31;1.10] | 0.094 | 1.18 [0.68;2.08] | 0.554 |
| — < 190             |     |                  |       |                  |       |
| HER2-0              | 224 | 0.49 [0.32;0.77] | 0.002 | 1.00 (ref)       |       |
| HER2-low            | 76  | 0.74 [0.45;1.23] | 0.249 | 1.51[1.00;2.29]  | 0.050 |

Supplementary Figure S1. Outcomes according to baseline PLR. (A) OS and (B) I-DFS.

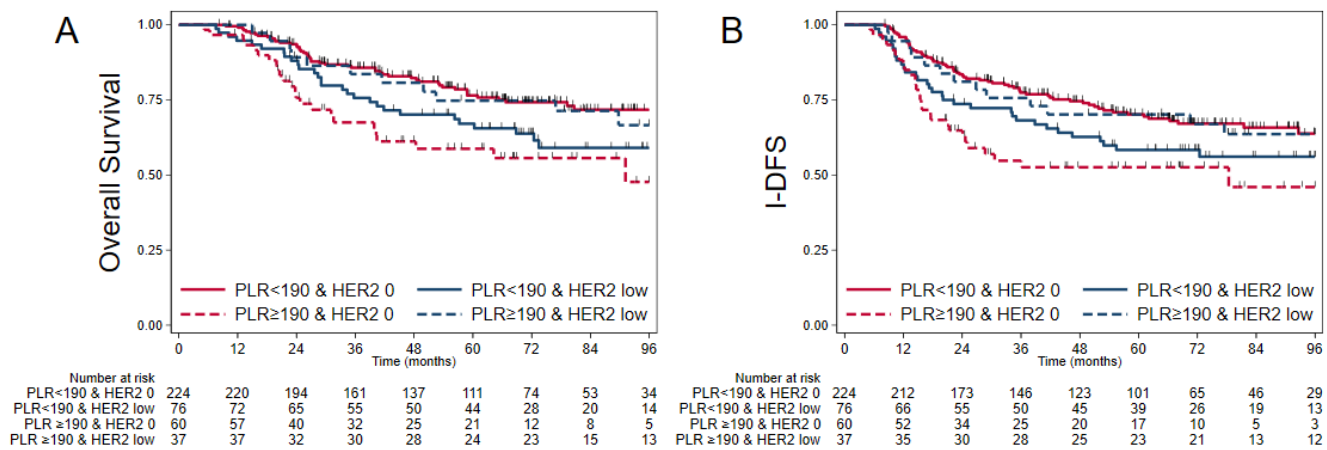

Supplement: s1 [file s1]
